# Supplementary material for: Circaea mollis Siebold & Zucc. Alleviates postmenopausal osteoporosis in a mouse model via the BMP-2/4/Runx2 pathway
Source: PubMed Central journal article supplement (PMC7178630; doi:10.1186/s12906-020-02914-7), 2020-04-22
Supplement: 12906_2020_2914_MOESM2_ESM.pdf [file 12906_2020_2914_MOESM2_ESM.pdf]

Figure1-F

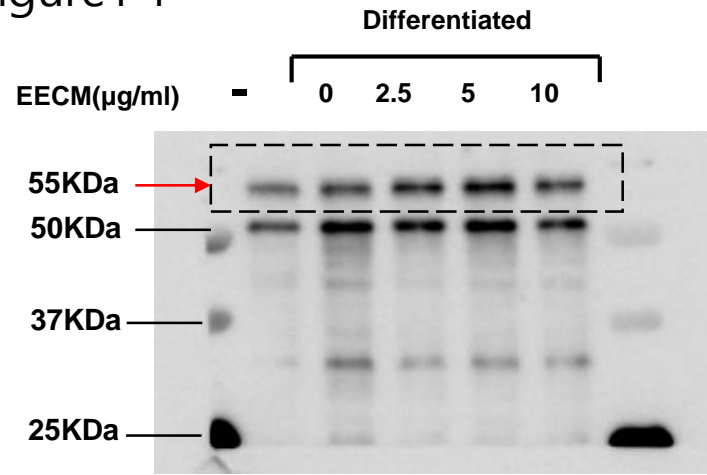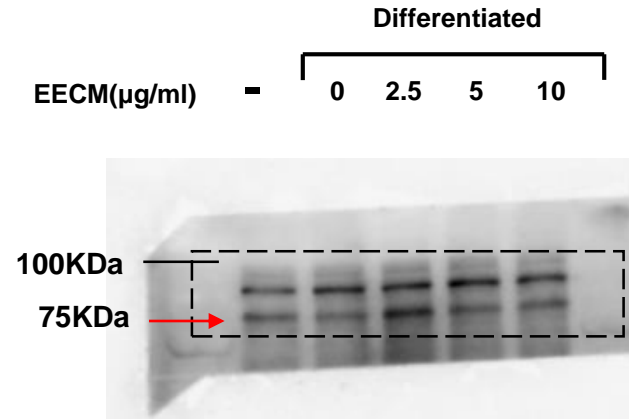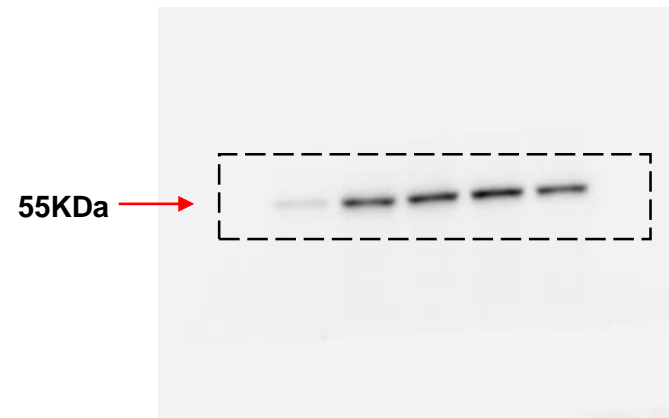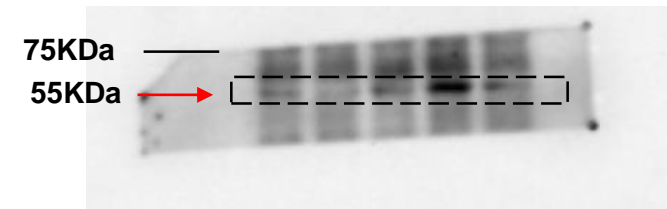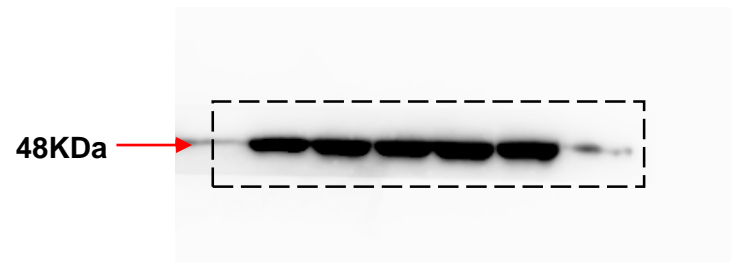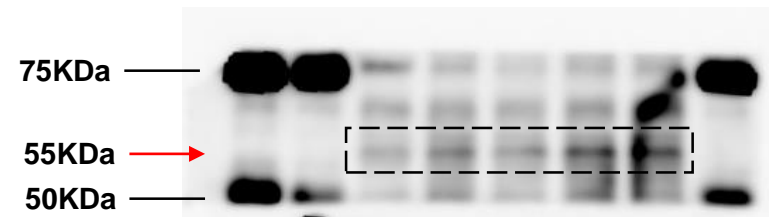

Figure3-C

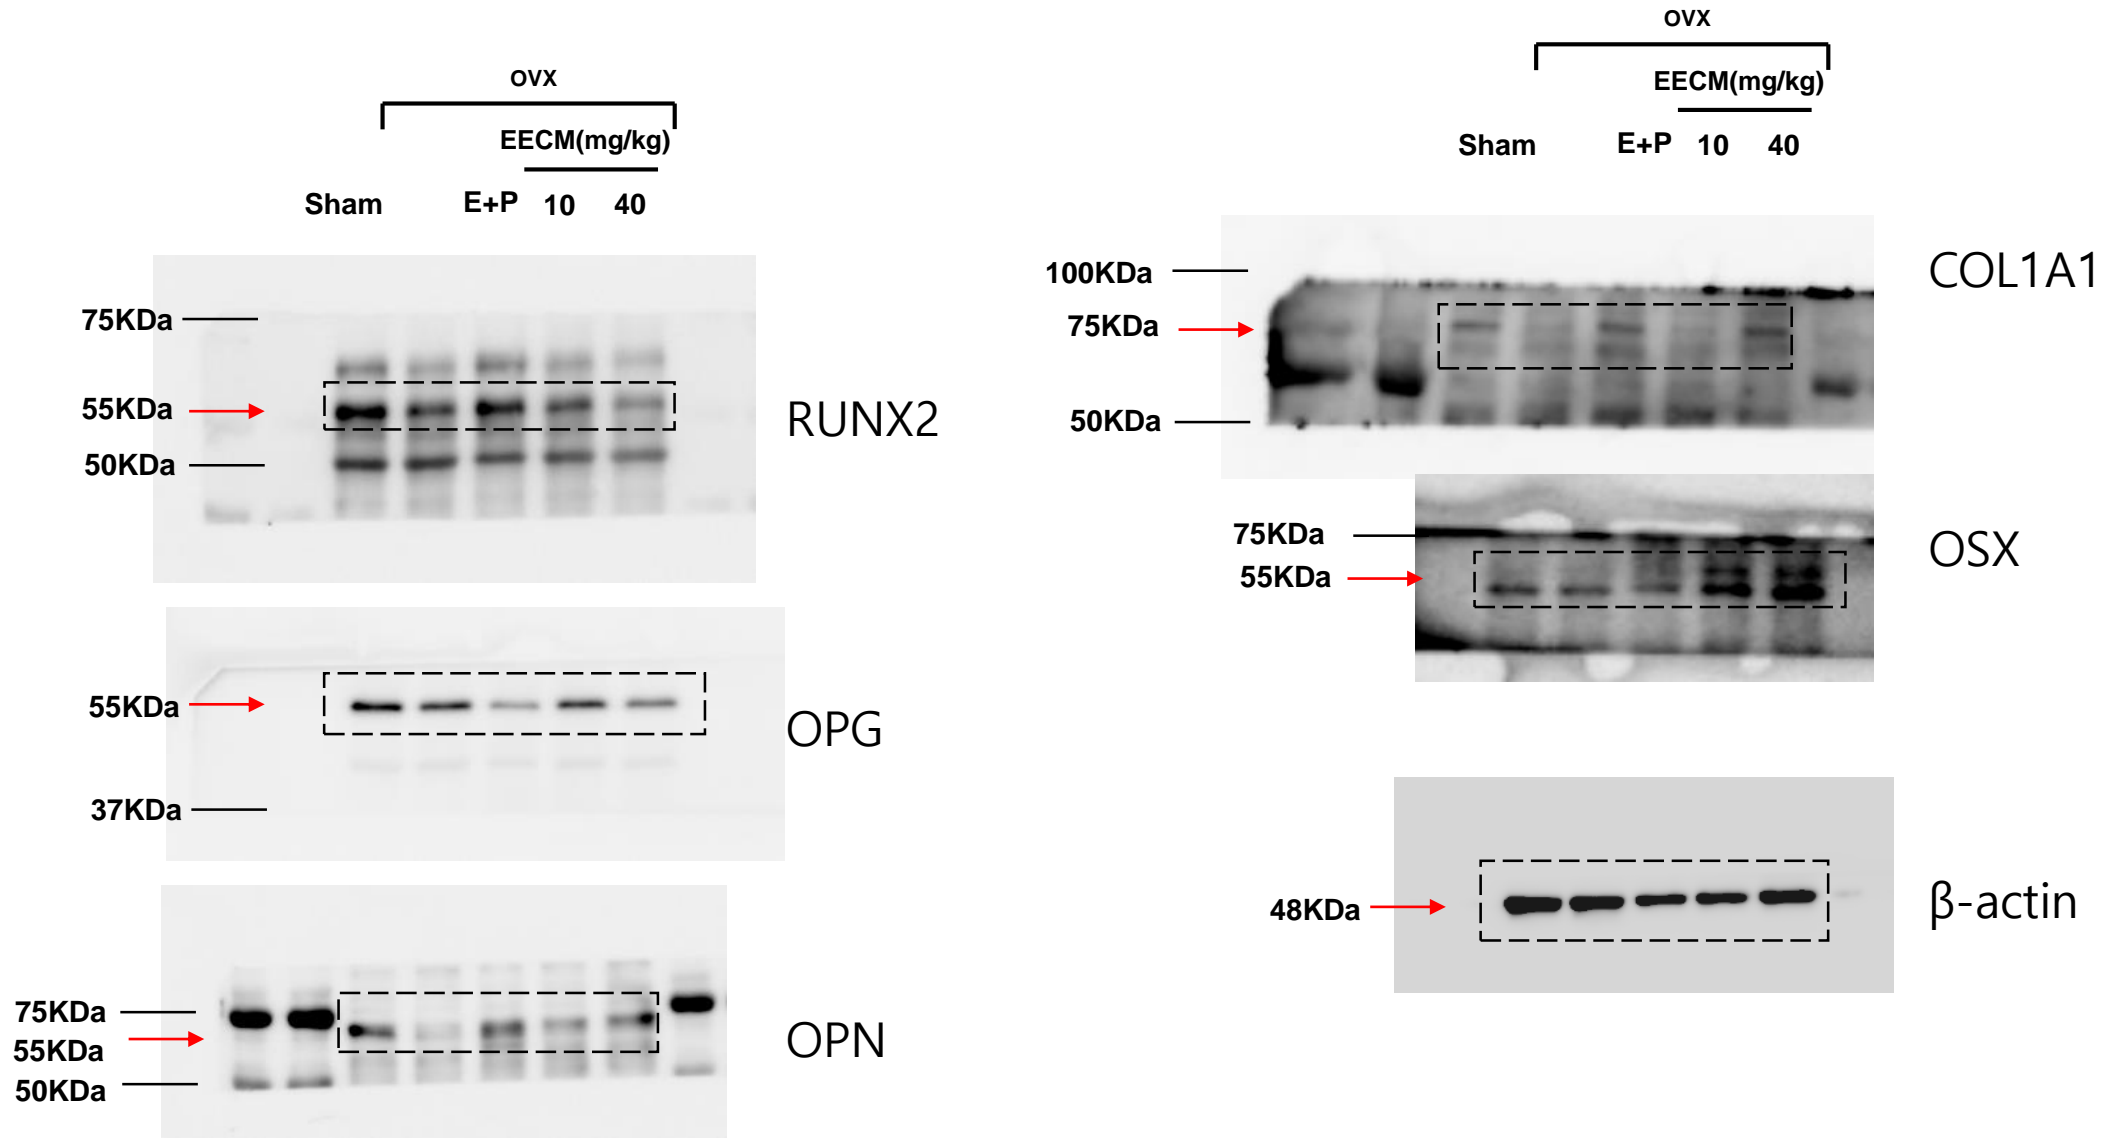

Figure4-D

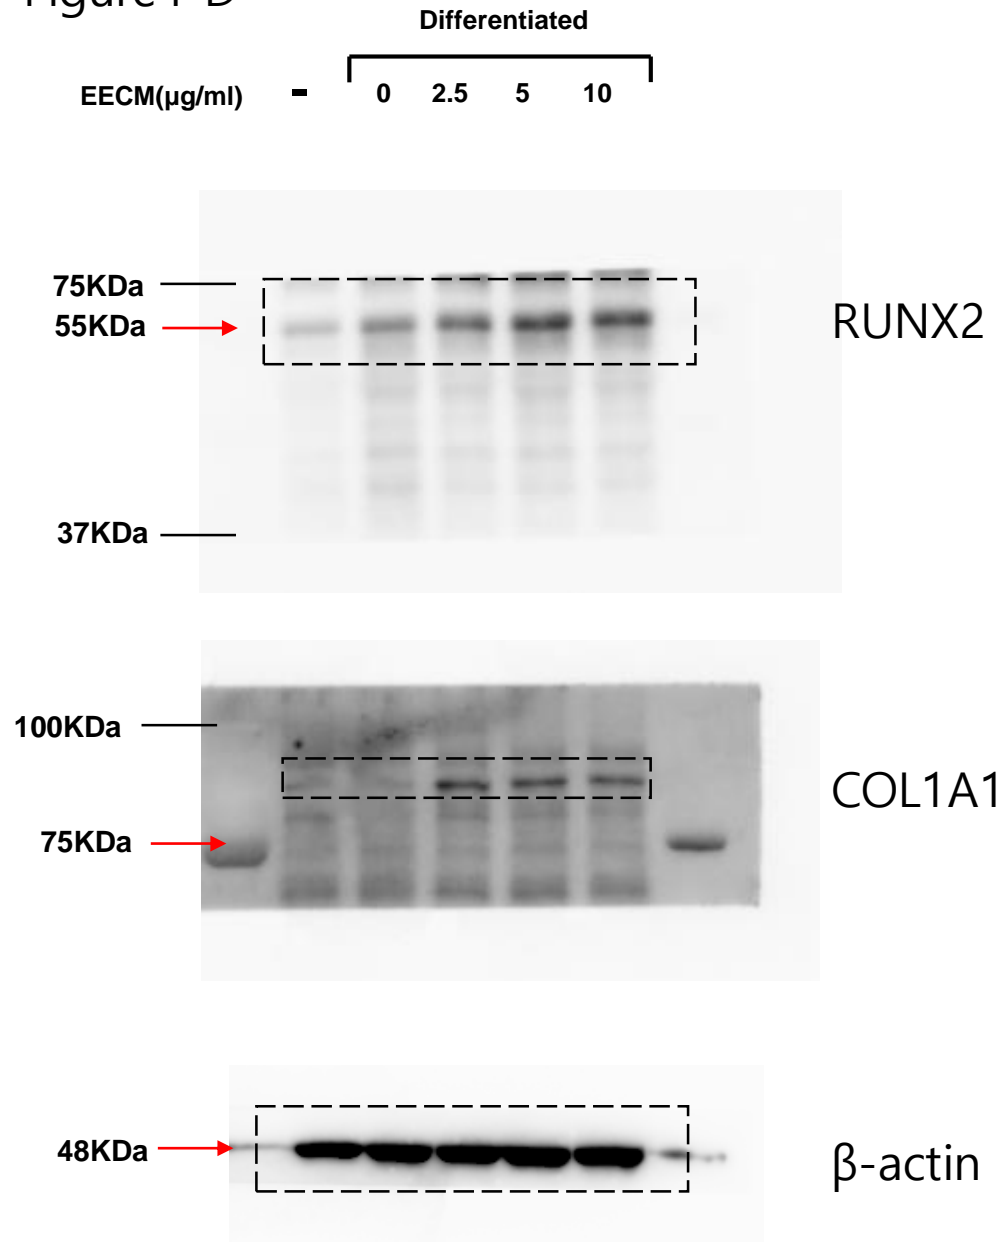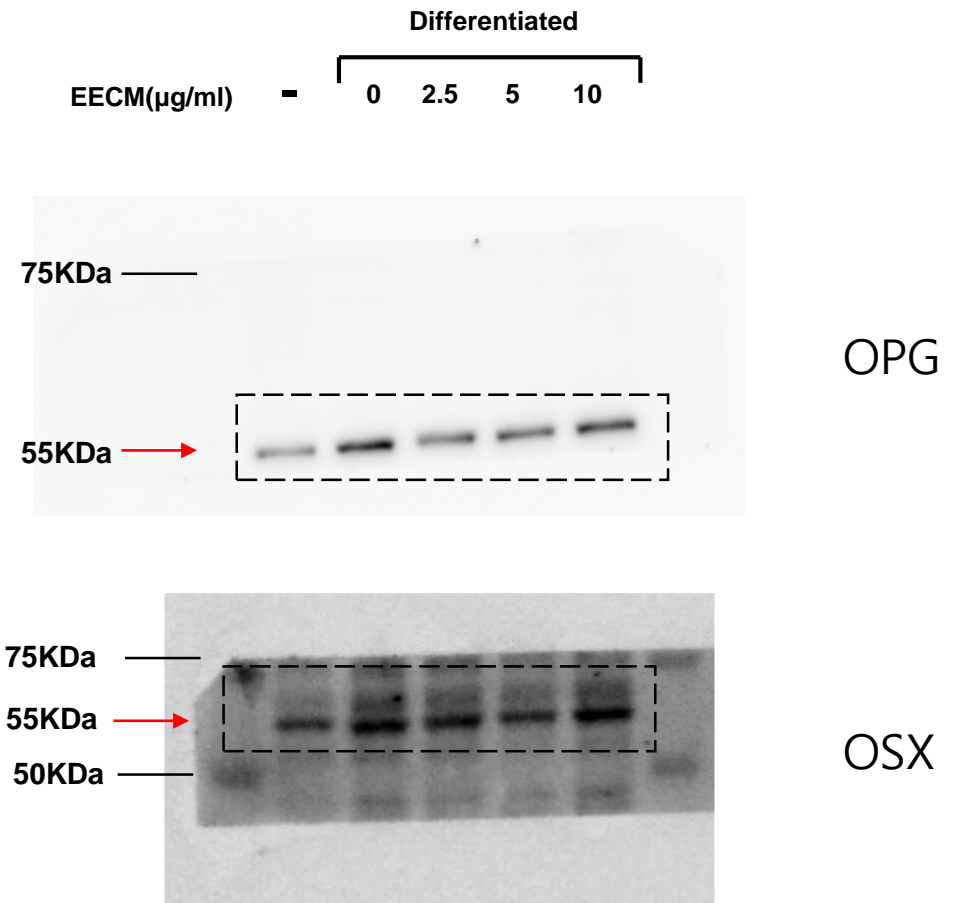

Figure5-A

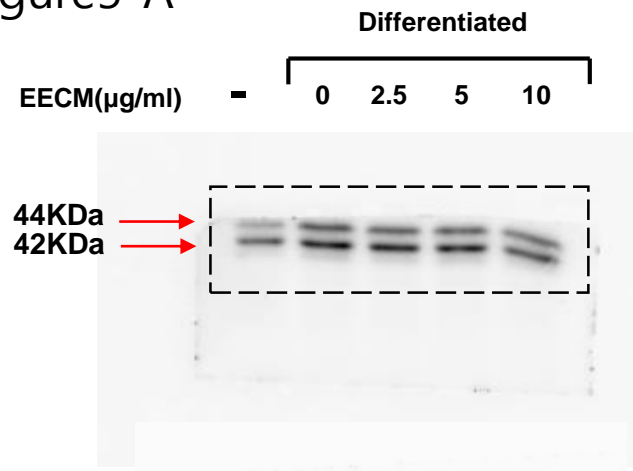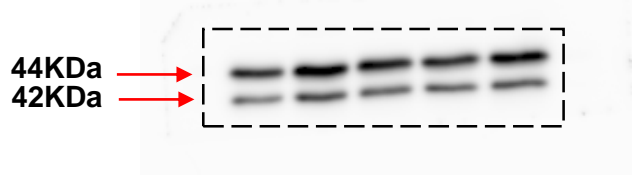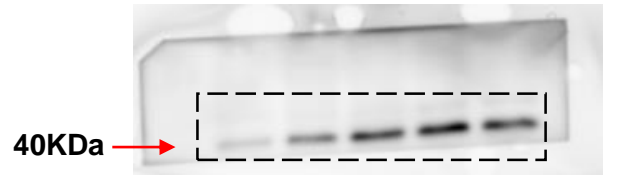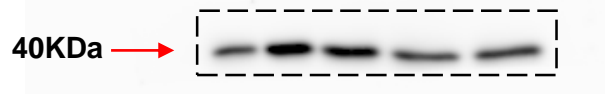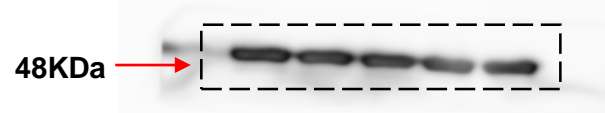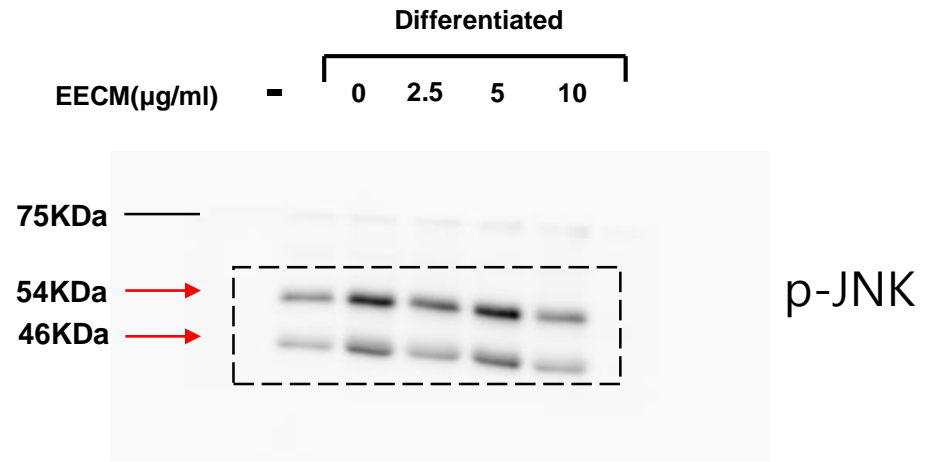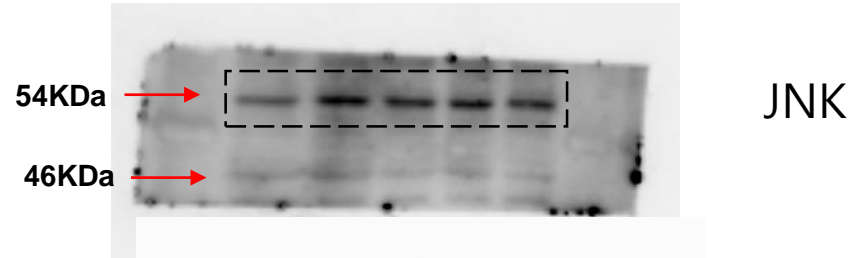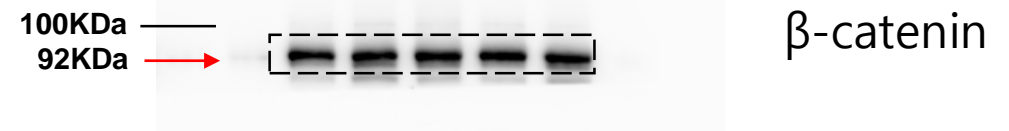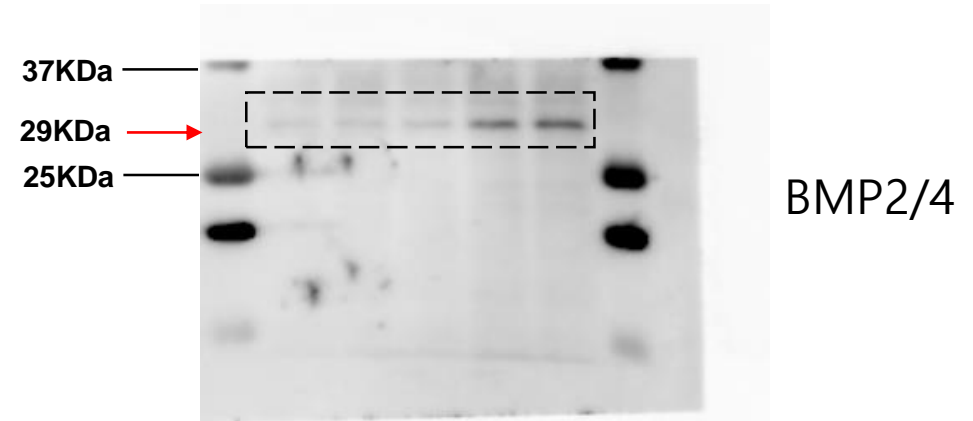

Figure5-C

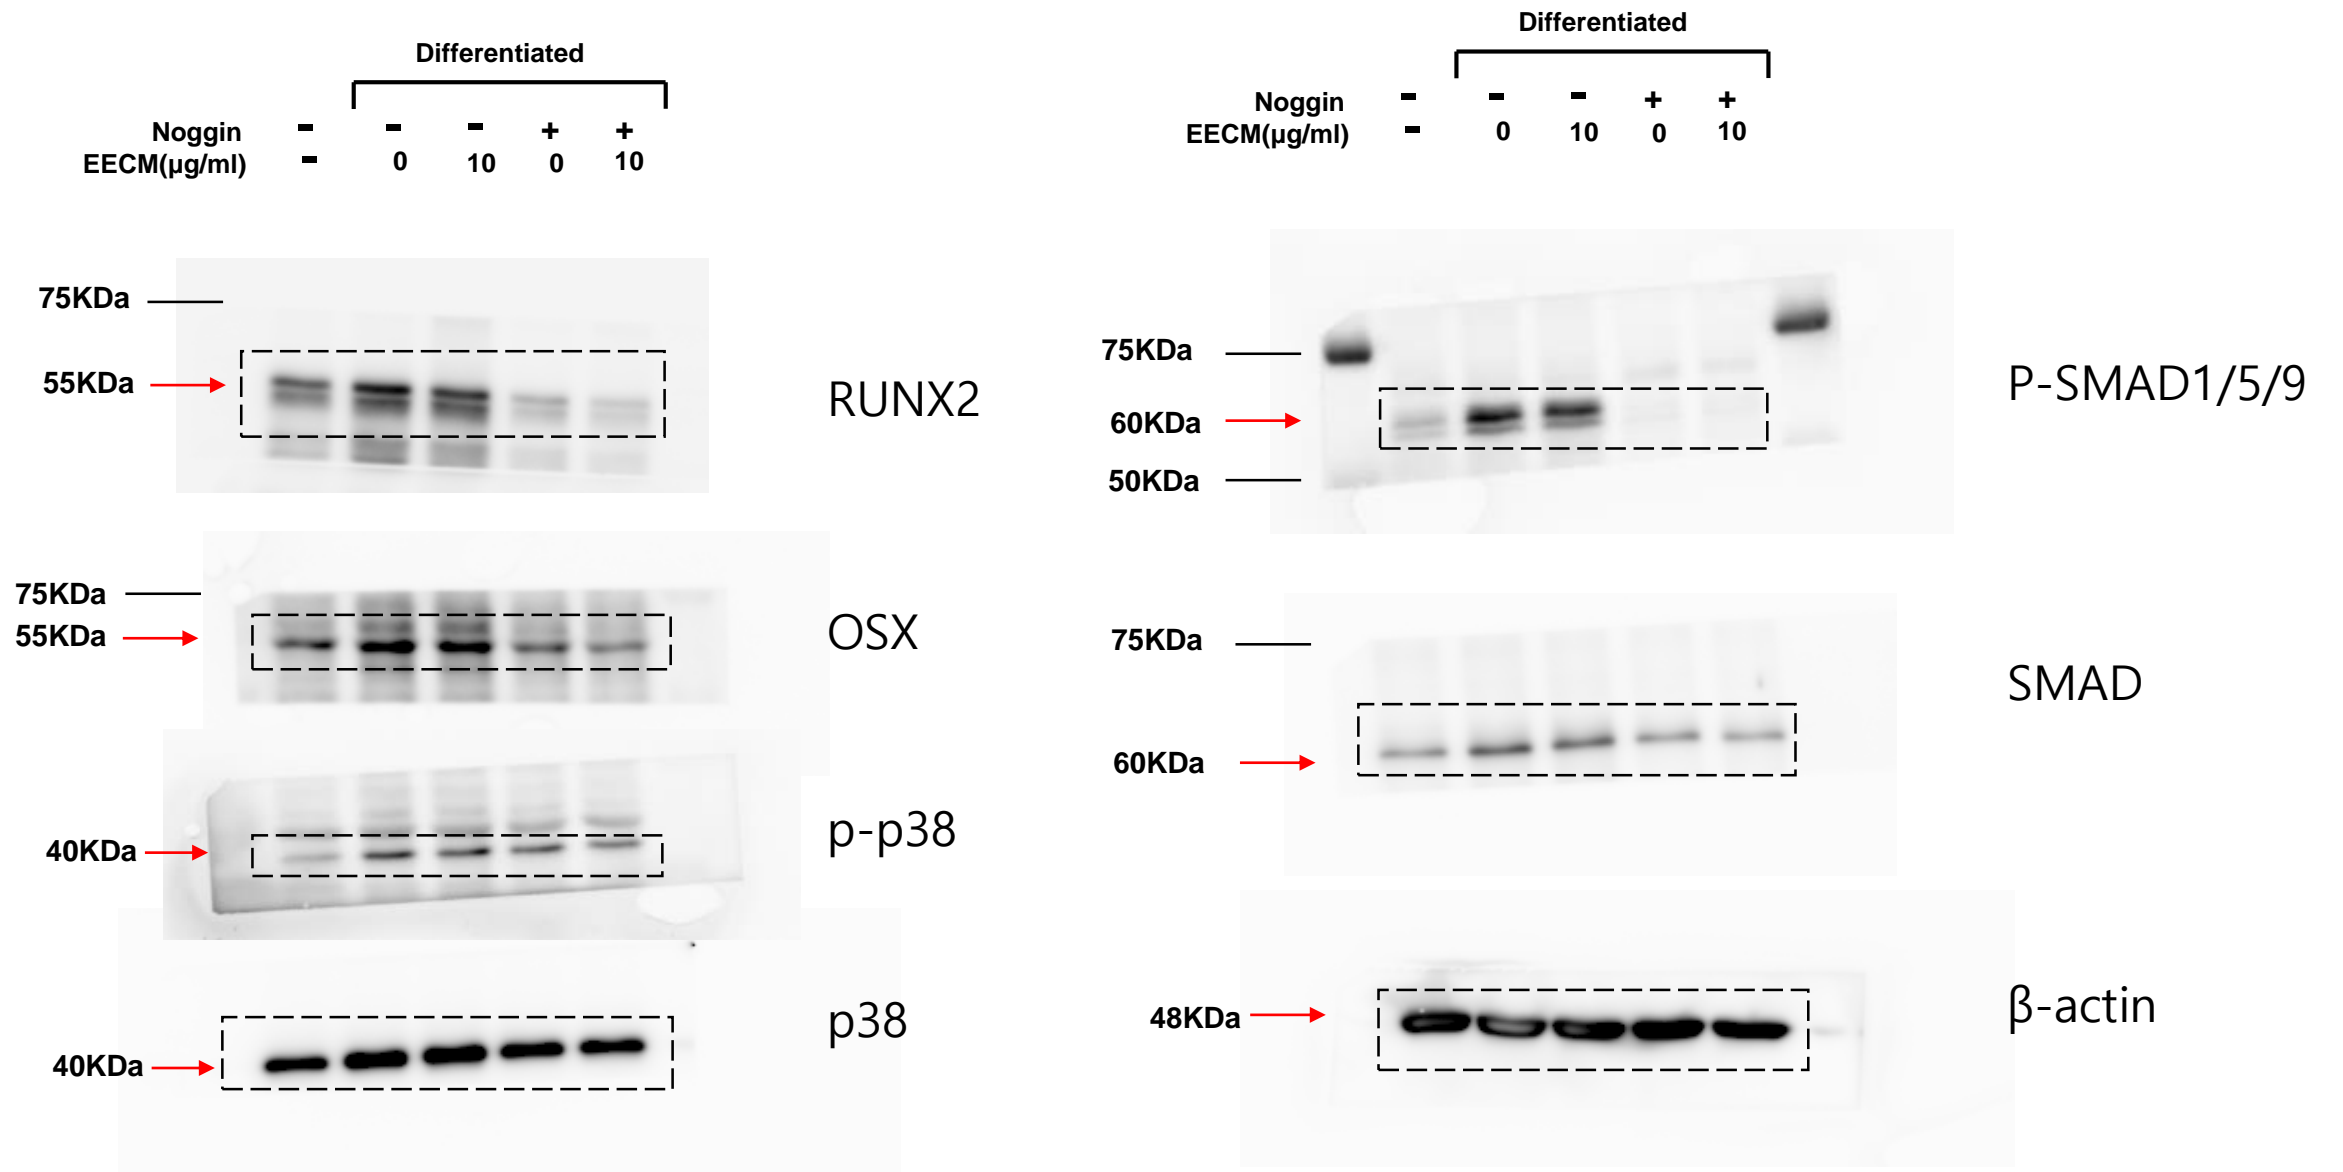

Figure5-F

|                   |   | Differentiated |    |   |    |
|-------------------|---|----------------|----|---|----|
| ICI 182,780       | - | -              | -  | + | +  |
| EECM( $\mu$ g/ml) | - | 0              | 10 | 0 | 10 |

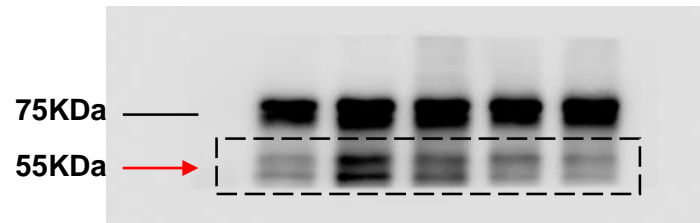

RUNX2

|                   |   | Differentiated |    |   |    |
|-------------------|---|----------------|----|---|----|
| ICI 182,780       | - | -              | -  | + | +  |
| EECM( $\mu$ g/ml) | - | 0              | 10 | 0 | 10 |

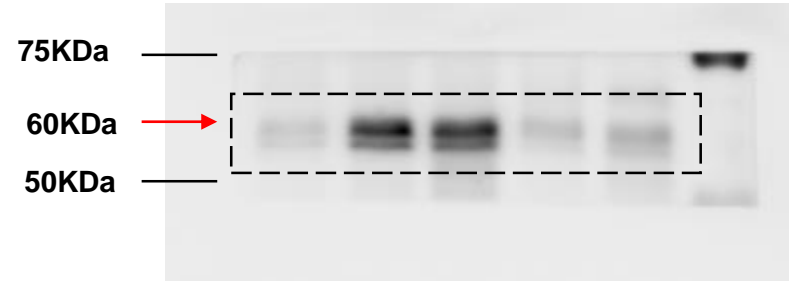

P-SMAD1/5/9

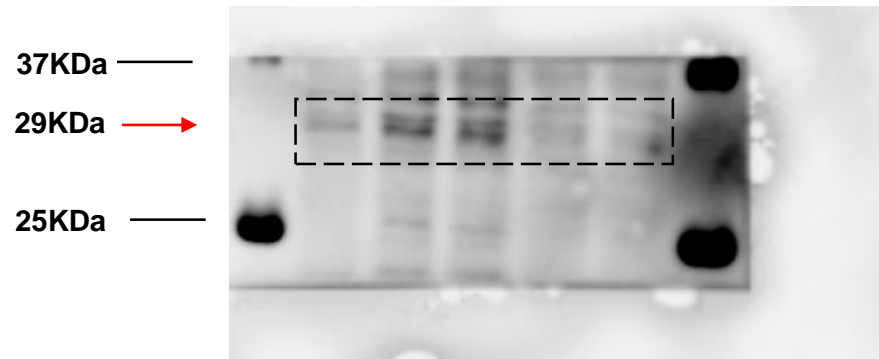

BMP2/4

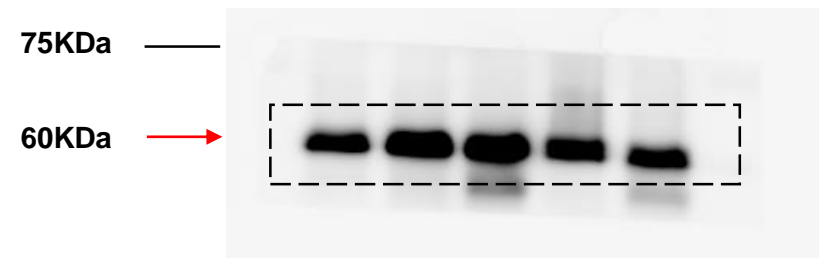

SMAD

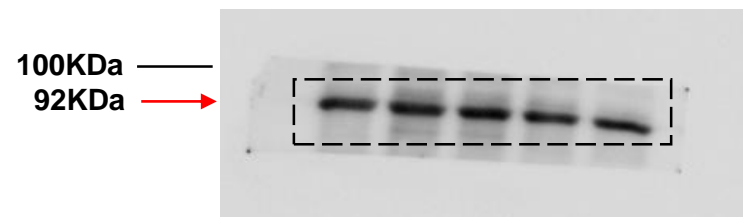

$\beta$ -actin
